# Supplementary material for: Salivary biomarkers in association with periodontal parameters and the periodontitis risk haplotype
Source: PubMed Central journal article supplement — Innate Immun. 2018 Sep 3;24(7):439–47. doi: 10.1177/1753425918796207 (PMC6830876; doi:10.1177/1753425918796207), 2018-09-03
Supplement: Supplemental_material.pdf [file Supplemental_material.pdf]

## Supplemental Material

**Supplementary Table 1.** Associations of single and combined (CRS) salivary biomarkers with polymorphisms located in the *LTA* gene.

| Polymorphisms in <i>LTA</i> gene |                                     |                              |                              |                      |
|----------------------------------|-------------------------------------|------------------------------|------------------------------|----------------------|
|                                  | rs2857708                           | rs2009658                    | rs2844482                    | rs1041981            |
| Independent                      | B coefficient (SE), <i>P</i> -value |                              |                              |                      |
| Log LTA (pg/ml)                  | <b>-0.853 (0.333), 0.011</b>        | <b>-0.861 (0.312), 0.006</b> | <b>-0.861 (0.312), 0.006</b> | 0.008 (0.187), 0.965 |

Linear regression model adjusted for age, n=291. LTA, lymphotoxin alpha; SE, standard error. Significant coefficients are highlighted by bold face.

Analyses were performed in the Parogene population (n = 455) including patients with an indication to coronary artery angiography.

**Supplementary Table 2.** Allele frequencies of the polymorphisms located in the *LTA* gene.

| <b>Polymorphism</b> | <b>Alleles</b> | <b>Frequency, n (%)</b> |
|---------------------|----------------|-------------------------|
| <b>rs2857708</b>    | GG             | 208 (71.5)              |
|                     | GA             | 75 (25.8)               |
|                     | AA             | 8 (2.7)                 |
| <b>rs2009658</b>    | CC             | 197 (67.7)              |
|                     | GC             | 83 (28.5)               |
|                     | GG             | 11 (3.8)                |
| <b>rs2844482</b>    | GG             | 197 (67.7)              |
|                     | GA             | 83 (28.5)               |
|                     | AA             | 11 (3.8)                |
| <b>rs1041981</b>    | CC             | 126 (43.3)              |
|                     | AA             | 124 (42.6)              |
|                     | CA             | 41 (14.0)               |

N of observations is 291.

Analyses were performed in the Parogene population (n = 455) including patients with an indication to coronary artery angiography.
